# Supplementary material for: The serine/threonine protein kinase MpSTE1 directly governs hyphal branching in Monascus spp.
Source: Springer Nature journal article supplement (doi:10.1007/s00253-024-13093-7), 2024-03-06
Supplement: MOESM1 [file 253_2024_13093_MOESM1_ESM.pdf]

Title page

**Applied Microbiology and Biotechnology**

**Supplementary Information**

**The serine/threonine protein kinase MpSTE1 directly governs hyphal branching in *Monascus*  
spp.**

Yali Duan<sup>1,2#</sup>, Xizhu Chen<sup>1,2#</sup>, Tingya Wang<sup>1,2#</sup>, Mu Li<sup>1,2\*</sup>

<sup>1</sup> Hubei International Scientific and Technological Cooperation Base of Traditional Fermented Foods,  
Key Laboratory of Environment Correlative Dietology, College of Food Science and Technology,  
Huazhong Agricultural University, Wuhan, Hubei Province, 430070, China

<sup>2</sup> College of Food Science and Technology, Huazhong Agricultural University, Wuhan, Hubei Province,  
430070, China

\* Corresponding authors: Mu Li, limu@mail.hzau.edu.cn; Fax: +86-27-87282111

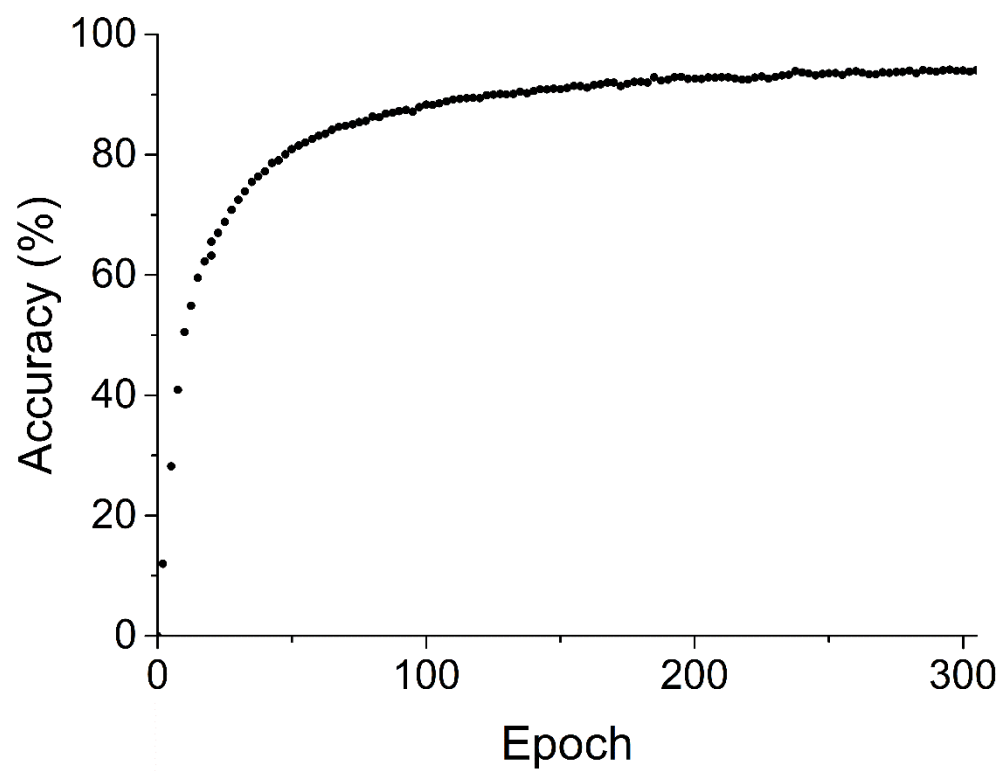

**Fig. S1** Plot of accuracy on the training datasets over training epochs for quantification of hyphal branching in the micrograph by a deep learning model HBDL. The accuracy on the test set is close to 97%.

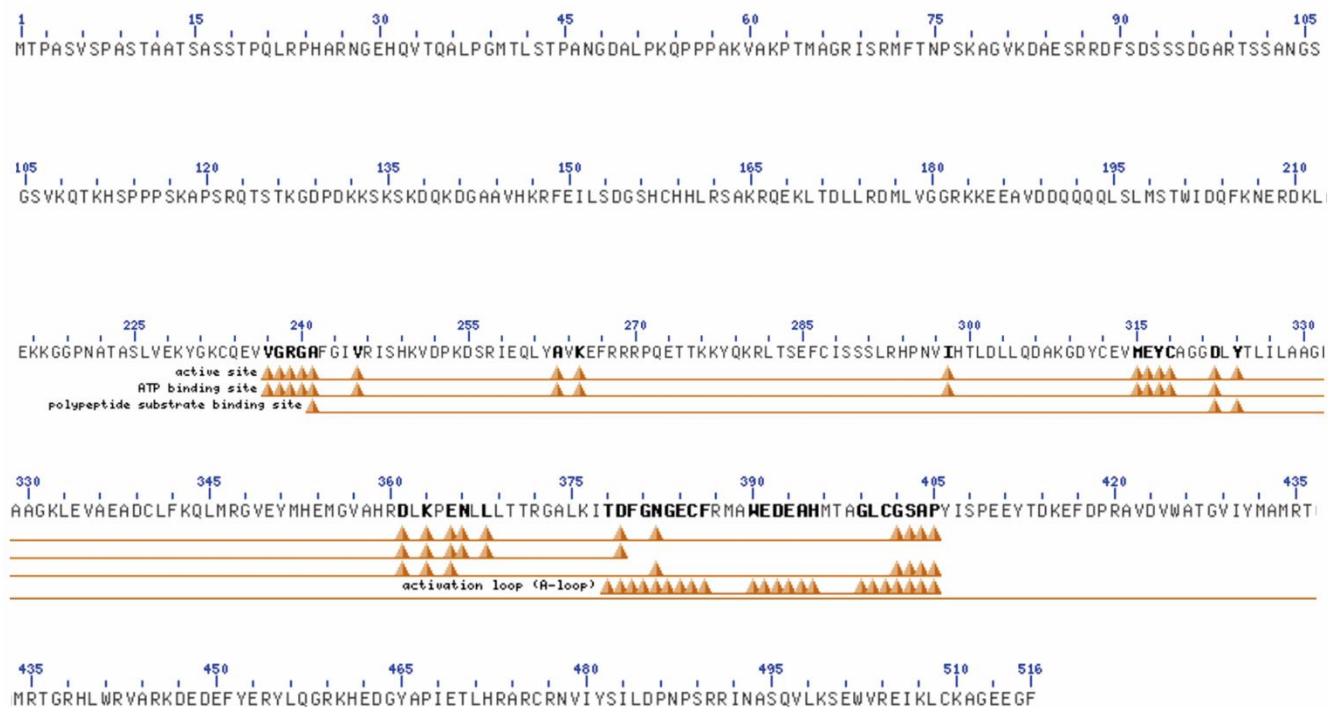

**Fig. S2** Sequence and proposed active residues of MpSTE1. The conserved catalytic domain contained catalytic site, ATP binding site and polypeptide substrate binding site. The proposed site is indicated as bold letter.

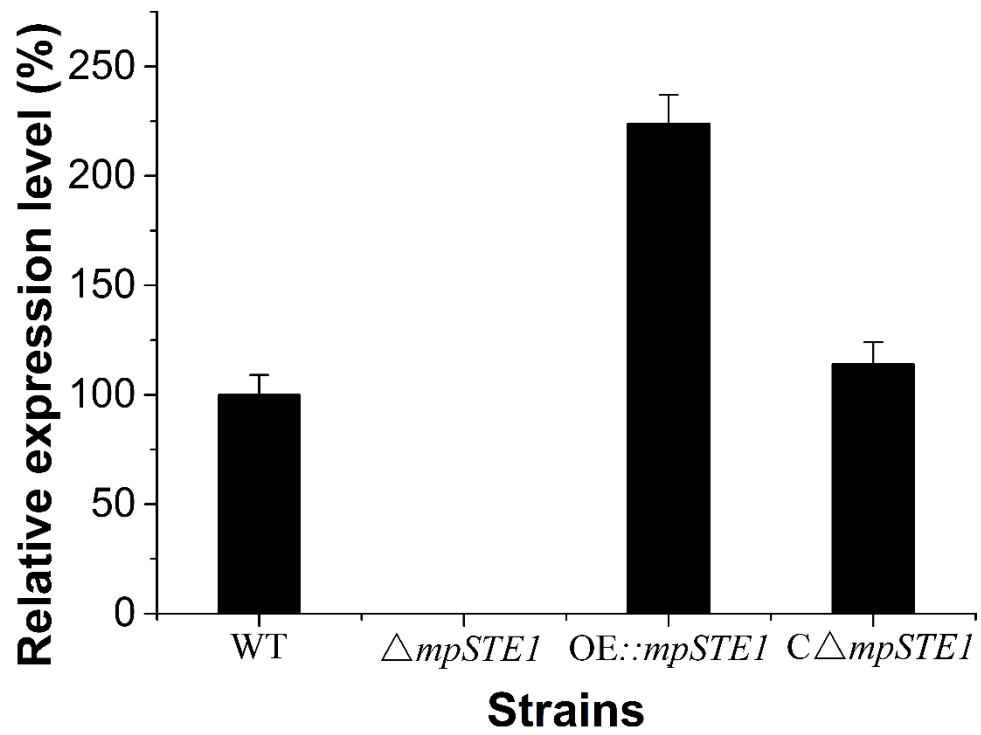

**Fig. S3** The relative expression level of the wild-type strain, *mpSTE1* gene knockout ( $\Delta mpSTE1$ ), complemented (C $\Delta mpSTE1$ ) and overexpression (OE::*mpSTE1*) mutants. The  $\beta$ -actin gene was used as an internal standard to normalize expression levels.
